# Supplementary material
Source: Royal Society of Chemistry journal article supplement (doi:10.1039/d6tb00255b)
Supplement: d6tb00255b1.pdf [file d6tb00255b1.pdf]

# Supporting Information

## Injectable VEGF-Loaded Gelatin-Hyaluronic Acid Hydrogel to Synergistically Promote Flap Survival via Rapid Angiogenesis

Dan Zhong,<sup>a</sup> Lin Zhi,<sup>b</sup> Haitao Xiao,<sup>\*b</sup> Xuewen Xu<sup>\*a,b</sup>

<sup>a</sup> Research Laboratory of Plastic and Burns Surgery, West China Hospital, Sichuan University, Chengdu 610041, China

<sup>b</sup> Department of Plastic and Burn Surgery, West China Hospital, Sichuan University, Chengdu 610041, China

\*Correspondence: [xhaitao@163.com](mailto:xhaitao@163.com); [xuxuewen@scu.edu.cn](mailto:xuxuewen@scu.edu.cn)

## **1. Materials and Methods**

### **1.1 Materials**

Gelatin (type-A powder, 300 Bloom), microbial transglutaminase (mTG, 200 U/g) and vascular endothelial growth factor (VEGF, 99%) were purchased from Shanghai yuanye Bio-Technology Co. Ltd. (China). Hyaluronic acid (HA,  $M_w = 10$  kDa) was purchased from Heowns Biochem Technologies LLC (China). Cell counting kit-8 (CCK-8) was obtained from Dojindo Laboratories (Japan). Fluorescein diacetate (FDA) and rhodamine B (RhB) was obtained from Sigma-Aldrich (USA). Crystal violet and Matrigel were purchased from Beyotime Biotechnology (China). 5-chloromethylfluorescein diacetate (CMFDA) was obtained from Yeasen Biotechnology (China).

### **1.2 HA and Gelatin Release**

To study the release of HA and gelatin from the hydrogels, three samples of each gel were soaked in PBS (0.01 M, pH 7.4) and incubated at 37°C. At specified time points (e.g., 1, 2, 3 and 7 d), the medium was entirely withdrawn and replaced by fresh PBS. The amount of HA was determined via a uronic acid assay <sup>1</sup>, with a standard curve established using pristine HA. And the amount of released gelatin was measured using a BCA protein assay kit. The released HA (wt%) was calculated according to the equation: released HA/total HA  $\times 100\%$ .

## 2. Supplementary Data

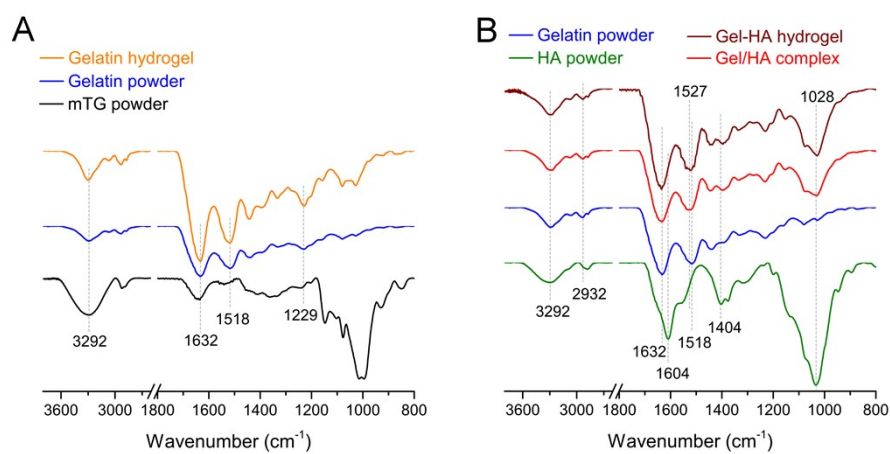

**Fig S1.** Photograph of the injectability of Rhodamine B-loaded Gel-HA hydrogel through needle.

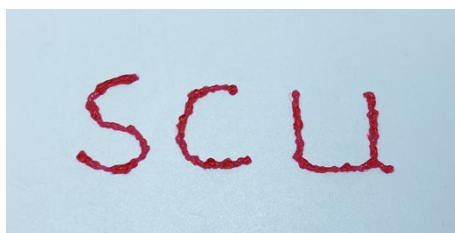

**Fig S2.** Photograph of the injectability of Rhodamine B-loaded Gel-HA hydrogel through needle.

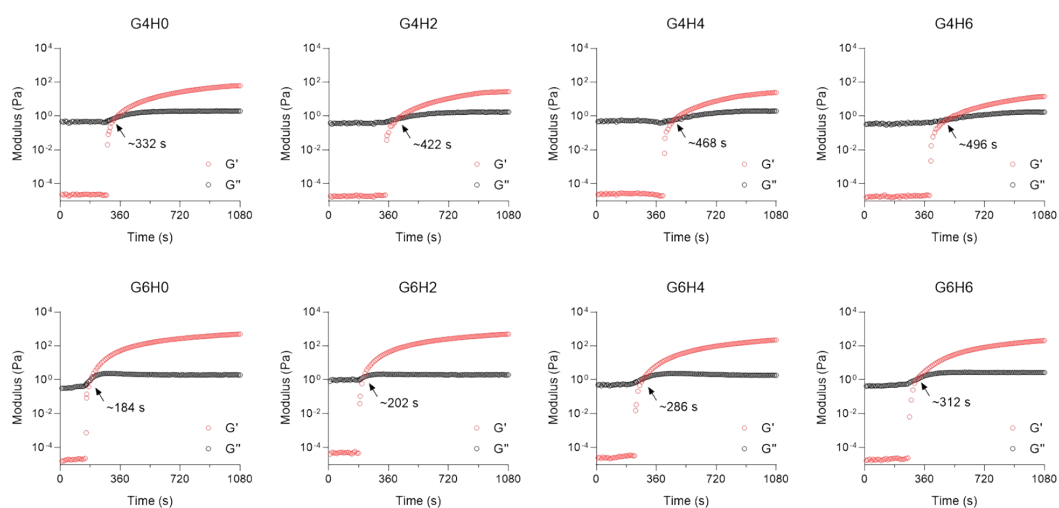

**Fig. S3.** Rheological properties of hydrogels. The  $G'$  and  $G''$  of these hydrogels at 37°C.

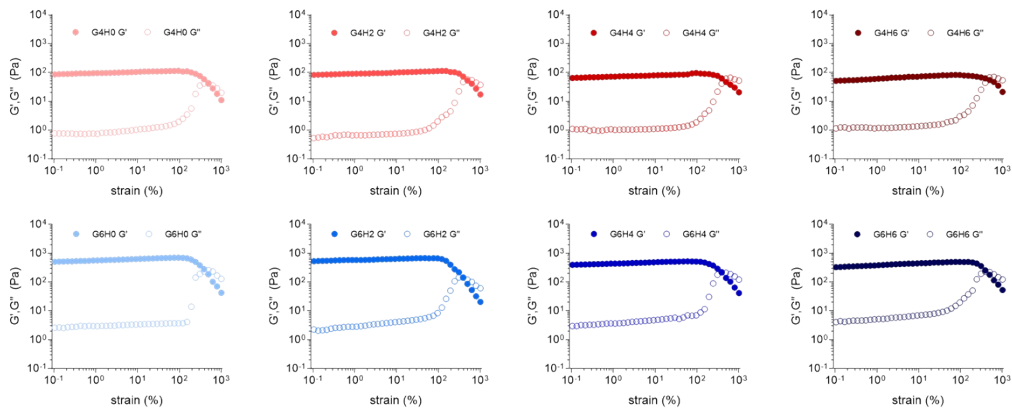

**Fig. S4.** The strain amplitude sweep test ( $\gamma = 0.1\%-1000\%$ ) for the hydrogels at a fixed frequency of 1 Hz at 37°C.

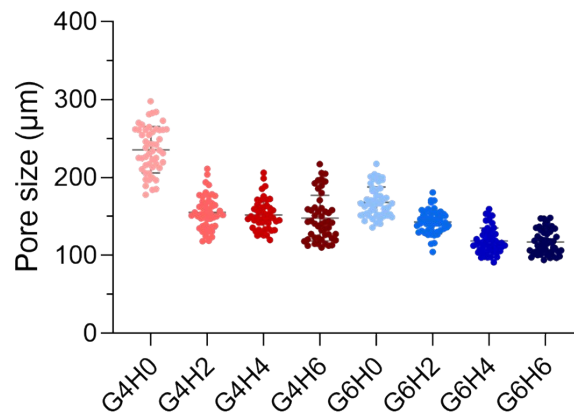

**Fig. S5.** The pore size of these hydrogels as calculated from SEM images.

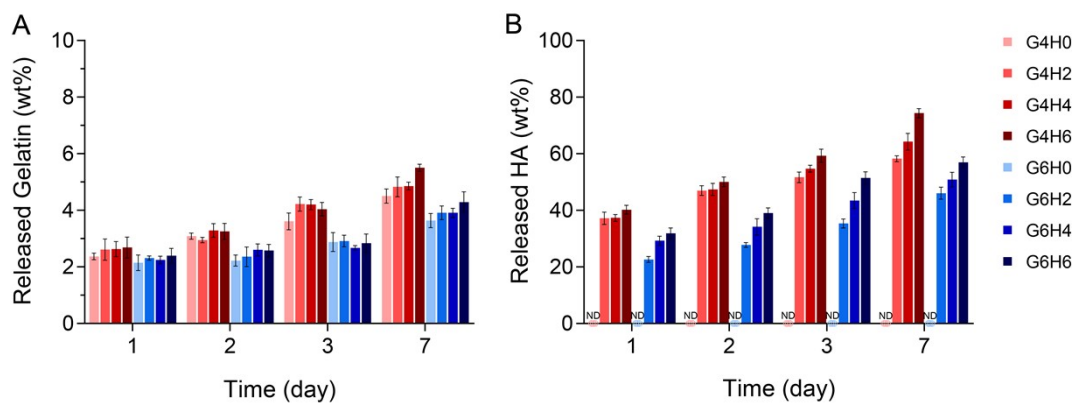

**Fig. S6.** Amount (wt%) of gelatin (A) and HA (B) released from the Gel-HA hydrogel in PBS at 37°C after different incubation times. ND: not detected. \* $P < 0.05$ , # $P < 0.01$ .

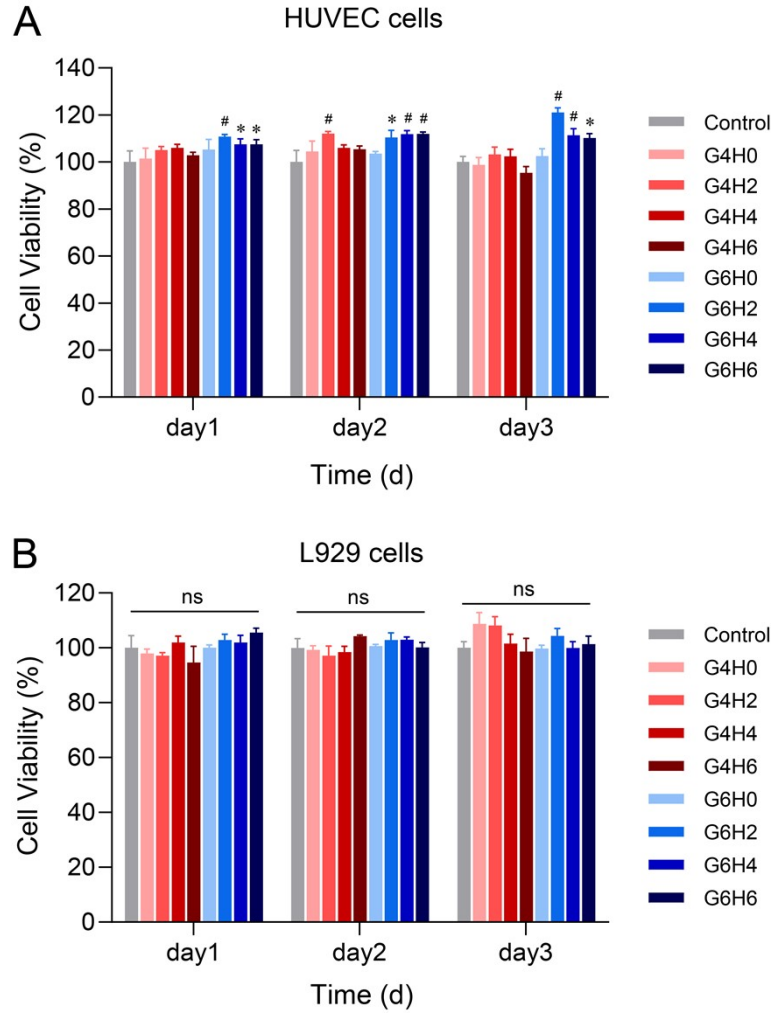

**Fig. S7.** Cell viability of HUVECs (A) and L929 cells (B) after treatment with Gel-HA hydrogels for 1, 2 and 3 days. ns: no significance, \* $P < 0.05$ , # $P < 0.01$ .

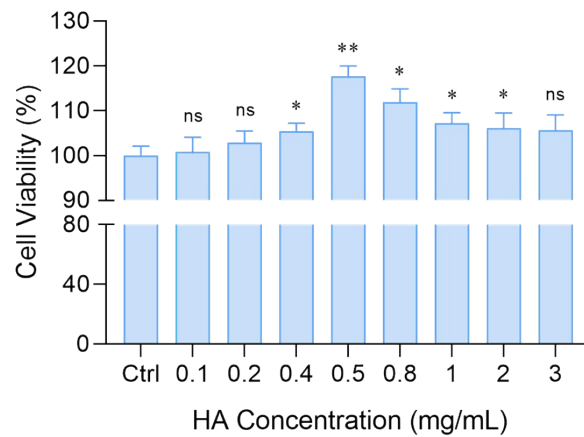

**Fig. S8.** Cell viability of HUVECs with the treatment of different concentrations of oligomeric HA for 48 h. ns: no significance, \* $P < 0.05$ , \*\* $P < 0.01$ .

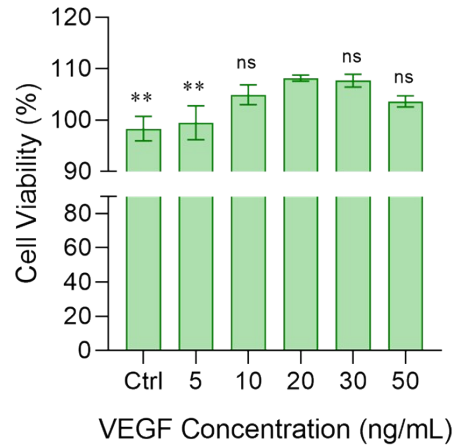

**Fig. S9.** Cell viability of HUVECs with the treatment of different concentrations of VEGF for 48 h. ns: no significance, \*\* $P < 0.01$ .

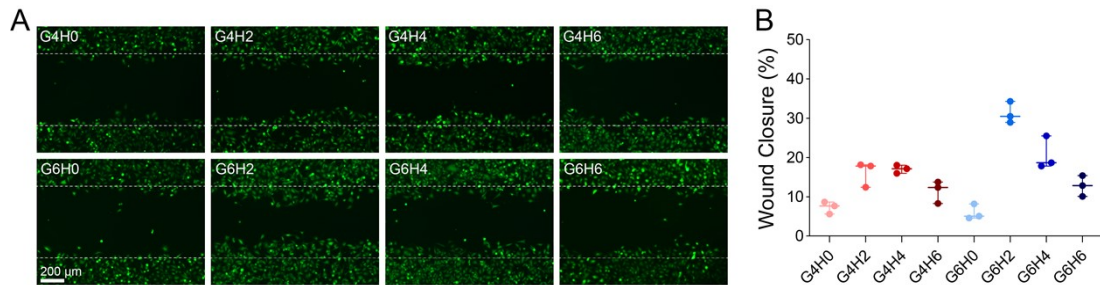

**Fig. S10.** (A) Scratch assay and (B) corresponding quantitative analysis evaluating the migration activity of HUVECs in the presence with Gel-HA hydrogels. The white lines indicate the scratch positions at 0 h. HUVECs were pre-labeled with 5-chloromethylfluorescein diacetate (CMFDA). Scale bar: 200  $\mu$ m.

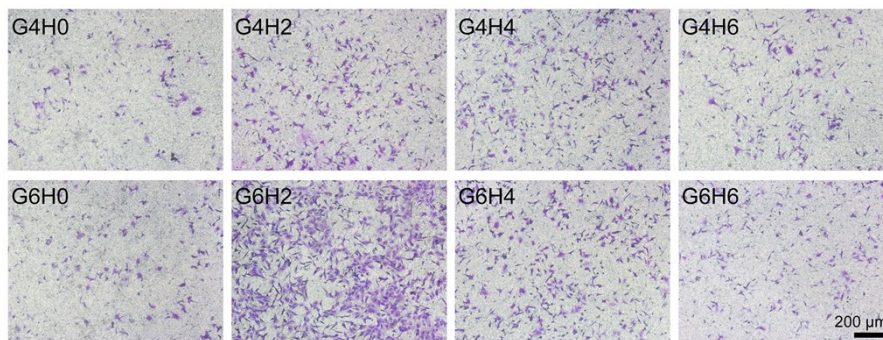

**Fig. S11.** Transwell assay accessing the migration activity of HUVECs in the presence with Gel-HA hydrogels. The migrated cells were stained with crystal violet. Scale bar: 200  $\mu$ m.

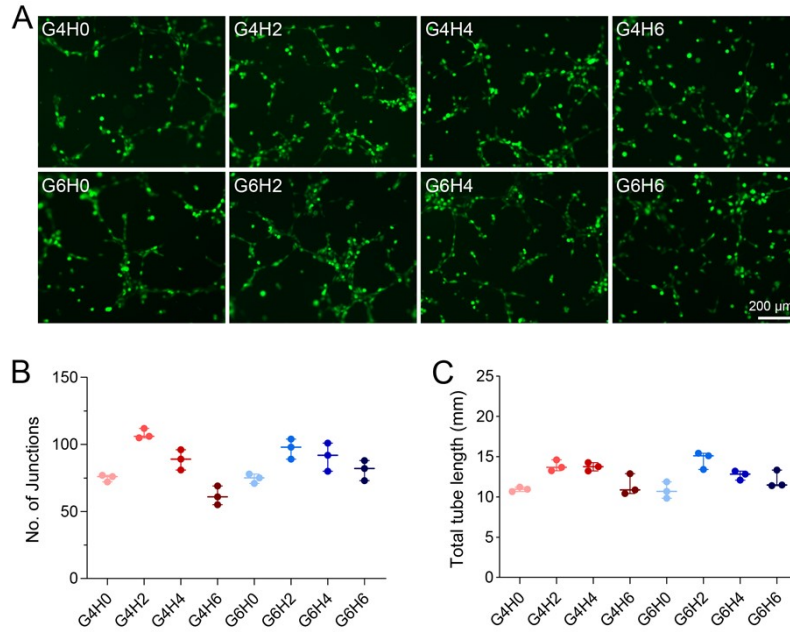

**Fig. S12.** (A) Optical microscope images and (B, C) corresponding quantitative analysis of the number of joint and total length evaluating the tube formation ability of HUVECs in the presence with Gel-HA hydrogels. HUVECs were prelabeled with CMFDA. Scale bar: 200  $\mu\text{m}$ .

**Table S1.** Parameter and gelation time of Gelatin-Hyaluronic acid (Gel-HA) hydrogel samples at 37°C. GxHy represents the gelatin concentration of x and hyaluronic acid concentration of y.

| Sample | Gelatin (w/v) | HA (w/v) | Gelation time (min) |
|--------|---------------|----------|---------------------|
| G4H0   | 4%            | -        | $6.62 \pm 0.14$     |
| G4H2   | 4%            | 2%       | $7.92 \pm 0.16$     |
| G4H4   | 4%            | 4%       | $8.66 \pm 0.25$     |
| G4H6   | 4%            | 6%       | $9.09 \pm 0.17$     |
| G6H0   | 6%            | -        | $4.15 \pm 0.18$     |
| G6H2   | 6%            | 2%       | $4.31 \pm 0.17$     |
| G6H4   | 6%            | 4%       | $5.72 \pm 0.18$     |
| G6H6   | 6%            | 6%       | $6.19 \pm 0.15$     |

## References

1. C. Loebel, C. B. Rodell, M. H. Chen and J. A. Burdick, *Nature protocols*, 2017, **12**, 1521-1541.
